# Supplementary material for: Interleukin-7 levels in synovial fluid increase with age and MMP-1 levels decrease with progression of osteoarthritis
Source: PubMed Central journal article supplement (PMC3278659; doi:10.3109/17453674.2011.645195), 2012-02-08
Supplement: ORT-1745-3674-83-059-s4558.pdf [file ORT-1745-3674-83-059-s4558.pdf]

## Supplementary article data

## Interleukin-7 levels in synovial fluid increase with age and MMP-1 levels decrease with progression of osteoarthritis

René Rübenhagen<sup>1</sup>, Jan Philipp Schüttrumpf<sup>1</sup>, Klaus Michael Stürmer<sup>1</sup>, and Karl-Heinz Frosch<sup>2</sup>

<sup>1</sup>Department of Trauma Surgery, Plastic and Reconstructive Surgery, Georg-August University, Goettingen; <sup>2</sup>Department of Trauma and Reconstructive Surgery, Asklepios Clinic, St. Georg, Hamburg, Germany  
Correspondence: j.p.schuettrumpf@med.uni-goettingen.de  
Submitted 10-12-12. Accepted 11-07-24

Table 1. Correlation (Spearman's rank correlation coefficient) between the levels of two mediators in SF from all patients

|                | IL-7  | MMP-1 | MMP-2 | MMP-13 | MCP-1 | VEGF  | IL-6  | MIP-1 $\alpha$ | MMP-9 | IL-1Ra | IL-8  | HGF   | IL-18 |
|----------------|-------|-------|-------|--------|-------|-------|-------|----------------|-------|--------|-------|-------|-------|
| Age            | 0.53  | -0.44 | -0.23 | 0.07   | 0.13  | 0.30  | 0.23  | 0.23           | -0.02 | -0.02  | 0.13  | 0.02  | -0.07 |
| BMI            | 0.44  | -0.15 | -0.06 | 0.01   | -0.09 | 0.06  | 0.08  | 0.23           | 0.07  | 0.11   | -0.02 | 0.00  | 0.14  |
| IL-7           |       | -0.04 | 0.17  | 0.31   | 0.12  | 0.24  | 0.26  | 0.44           | 0.02  | 0.04   | -0.04 | 0.36  | 0.23  |
| MMP-1          | -0.04 |       | 0.38  | 0.18   | -0.09 | -0.17 | 0.23  | 0.12           | -0.15 | 0.06   | 0.29  | 0.07  | 0.24  |
| MMP-2          | 0.17  | 0.38  |       | 0.12   | -0.13 | -0.15 | 0.09  | 0.05           | -0.24 | -0.22  | -0.09 | 0.18  | 0.02  |
| MMP-13         | 0.31  | 0.18  | 0.12  |        | 0.40  | 0.39  | 0.24  | 0.12           | -0.07 | -0.02  | 0.22  | 0.28  | 0.10  |
| MCP-1          | 0.12  | -0.09 | -0.13 | 0.40   |       | 0.58  | 0.29  | 0.27           | 0.08  | 0.23   | 0.37  | 0.13  | -0.01 |
| VEGF           | 0.24  | -0.17 | -0.15 | 0.39   | 0.58  |       | 0.24  | 0.23           | 0.00  | 0.03   | 0.24  | 0.04  | 0.07  |
| IL-6           | 0.26  | 0.23  | 0.09  | 0.24   | 0.29  | 0.24  |       | 0.18           | -0.16 | 0.36   | 0.50  | 0.22  | -0.03 |
| MIP-1 $\alpha$ | 0.44  | 0.12  | 0.05  | 0.12   | 0.27  | 0.23  | 0.18  |                | 0.32  | 0.33   | 0.32  | 0.23  | 0.24  |
| MMP-9          | 0.02  | -0.15 | -0.24 | -0.07  | 0.08  | 0.00  | -0.16 | 0.32           |       | 0.46   | 0.34  | -0.04 | 0.34  |
| IL-1Ra         | 0.04  | 0.06  | -0.22 | -0.02  | 0.23  | 0.03  | 0.36  | 0.33           | 0.46  |        | 0.56  | 0.26  | 0.29  |
| IL-8           | -0.04 | 0.29  | -0.09 | 0.22   | 0.37  | 0.24  | 0.50  | 0.32           | 0.34  | 0.56   |       | 0.06  | 0.34  |
| HGF            | 0.36  | 0.07  | 0.18  | 0.28   | 0.13  | 0.04  | 0.22  | 0.23           | -0.04 | 0.26   | 0.06  |       | 0.20  |

Table 2. Correlation (Spearman's rank correlation coefficient) between the levels of two mediators in SF from patients with OA grade 0, 1, or 2 (part A) or OA grade 3 or 4 (part B)

|                         | IL-7  | MMP-1 | MMP-2 | MMP-13 | MCP-1 | VEGF  | IL-6  | MIP-1 $\alpha$ | MMP-9 | IL-1Ra | IL-8  | HGF   | IL-18 |
|-------------------------|-------|-------|-------|--------|-------|-------|-------|----------------|-------|--------|-------|-------|-------|
| A (OA grade 0, 1, or 2) |       |       |       |        |       |       |       |                |       |        |       |       |       |
| Age                     | 0.52  | -0.20 | -0.11 | 0.15   | 0.12  | 0.24  | 0.22  | 0.19           | -0.12 | 0.10   | 0.00  | 0.11  | -0.06 |
| BMI                     | 0.48  | -0.15 | -0.05 | 0.13   | -0.13 | 0.07  | 0.15  | 0.23           | 0.00  | 0.10   | -0.09 | 0.06  | 0.25  |
| IL-7                    |       | -0.02 | 0.09  | 0.39   | 0.04  | 0.20  | 0.31  | 0.46           | 0.00  | 0.01   | -0.15 | 0.37  | 0.17  |
| MMP-1                   | -0.02 |       | 0.26  | 0.48   | 0.00  | 0.03  | 0.32  | 0.15           | -0.12 | -0.02  | 0.51  | -0.05 | 0.28  |
| MMP-2                   | 0.09  | 0.26  |       | 0.25   | -0.10 | -0.04 | 0.11  | 0.07           | -0.24 | -0.26  | -0.06 | 0.22  | -0.03 |
| MMP-13                  | 0.39  | 0.48  | 0.25  |        | 0.26  | 0.39  | 0.32  | 0.17           | -0.03 | -0.03  | 0.24  | 0.36  | 0.28  |
| MCP-1                   | 0.04  | 0.00  | -0.10 | 0.26   |       | 0.54  | 0.21  | 0.23           | 0.06  | 0.17   | 0.37  | 0.09  | 0.11  |
| VEGF                    | 0.20  | 0.03  | -0.04 | 0.39   | 0.54  |       | 0.17  | 0.20           | -0.07 | 0.02   | 0.28  | 0.16  | 0.23  |
| IL-6                    | 0.31  | 0.32  | 0.11  | 0.32   | 0.21  | 0.17  |       | 0.12           | -0.27 | 0.40   | 0.54  | 0.17  | 0.09  |
| MIP-1 $\alpha$          | 0.46  | 0.15  | 0.07  | 0.17   | 0.23  | 0.20  | 0.12  |                | 0.30  | 0.31   | 0.29  | 0.19  | 0.30  |
| MMP-9                   | 0.00  | -0.12 | -0.24 | -0.03  | 0.06  | -0.07 | -0.27 | 0.30           |       | 0.39   | 0.23  | -0.13 | 0.33  |
| IL-1Ra                  | 0.01  | -0.02 | -0.26 | -0.03  | 0.17  | 0.02  | 0.40  | 0.31           | 0.39  |        | 0.54  | 0.10  | 0.29  |
| IL-8                    | -0.15 | 0.51  | -0.06 | 0.24   | 0.37  | 0.28  | 0.54  | 0.29           | 0.23  | 0.54   |       | -0.08 | 0.45  |
| HGF                     | 0.37  | -0.05 | 0.22  | 0.36   | 0.09  | 0.16  | 0.17  | 0.19           | -0.13 | 0.10   | -0.08 |       | 0.14  |
| B (OA grade 3 or 4)     |       |       |       |        |       |       |       |                |       |        |       |       |       |
| Age                     | 0.06  | -0.13 | -0.12 | -0.03  | 0.15  | 0.05  | 0.47  | 0.23           | 0.20  | 0.08   | 0.43  | 0.24  | -0.05 |
| BMI                     | 0.11  | 0.26  | 0.13  | -0.01  | -0.02 | -0.05 | -0.10 | 0.18           | 0.22  | 0.15   | 0.05  | -0.02 | -0.04 |
| IL-7                    |       | 0.01  | 0.36  | 0.18   | 0.07  | 0.04  | -0.04 | -0.02          | -0.11 | 0.06   | 0.00  | 0.32  | 0.32  |
| MMP-1                   | 0.01  |       | 0.46  | -0.26  | -0.15 | -0.20 | 0.10  | 0.03           | 0.06  | 0.12   | 0.14  | 0.14  | 0.27  |
| MMP-2                   | 0.36  | 0.46  |       | -0.06  | -0.11 | -0.04 | 0.12  | -0.19          | -0.19 | -0.17  | -0.01 | 0.03  | 0.08  |
| MMP-13                  | 0.18  | -0.26 | -0.06 |        | 0.77  | 0.54  | 0.22  | 0.43           | 0.05  | 0.28   | 0.38  | 0.27  | -0.10 |
| MCP-1                   | 0.07  | -0.15 | -0.11 | 0.77   |       | 0.64  | 0.52  | 0.50           | 0.10  | 0.39   | 0.40  | 0.26  | -0.20 |
| VEGF                    | 0.04  | -0.20 | -0.04 | 0.54   | 0.64  |       | 0.50  | 0.36           | 0.03  | 0.11   | 0.16  | -0.01 | -0.15 |
| IL-6                    | -0.04 | 0.10  | 0.12  | 0.22   | 0.52  | 0.50  |       | 0.25           | 0.11  | 0.31   | 0.45  | 0.38  | -0.29 |
| MIP-1 $\alpha$          | -0.02 | 0.03  | -0.19 | 0.43   | 0.50  | 0.36  | 0.25  |                | 0.62  | 0.65   | 0.51  | 0.20  | 0.10  |
| MMP-9                   | -0.11 | 0.06  | -0.19 | 0.05   | 0.10  | 0.03  | 0.11  | 0.62           |       | 0.72   | 0.54  | 0.26  | 0.32  |
| IL-1Ra                  | 0.06  | 0.12  | -0.17 | 0.28   | 0.39  | 0.11  | 0.31  | 0.65           | 0.72  |        | 0.70  | 0.64  | 0.28  |
| IL-8                    | 0.00  | 0.14  | -0.01 | 0.38   | 0.40  | 0.16  | 0.45  | 0.51           | 0.54  | 0.70   |       | 0.54  | 0.10  |
| HGF                     | 0.32  | 0.14  | 0.03  | 0.27   | 0.26  | -0.01 | 0.38  | 0.20           | 0.26  | 0.64   | 0.54  |       | 0.28  |
